# Supplementary material
Source: PubMed Central journal article supplement (PMC3116721)
Supplement: NIHMS237085-supplement-Supp1.pdf [file NIHMS237085-supplement-Supp1.pdf]

## Supplemental Material

**Table I**

|                                                    | <i>Ldlr</i> <sup>-/-</sup> mice<br>wild-type BM | <i>Abcg1</i> <sup>-/-</sup> <i>Ldlr</i> <sup>-/-</sup> mice<br>wild-type BM |
|----------------------------------------------------|-------------------------------------------------|-----------------------------------------------------------------------------|
| plasma cholesterol levels<br>12 weeks WTD, study 1 | 1304 ± 63 mg/dl                                 | 1101 ± 41 mg/dl                                                             |
| plasma cholesterol levels<br>12 weeks WTD, study 2 | 1567 ± 91 mg/dl                                 | 1607 ± 94 mg/dl                                                             |
| plasma cholesterol levels<br>23 weeks WTD, study 2 | 1396 ± 135 mg/dl                                | 1284 ± 109 mg/dl                                                            |

**Supplemental Table I.** Plasma cholesterol levels in *Ldlr*<sup>-/-</sup> and *Abcg1*<sup>-/-</sup>*Ldlr*<sup>-/-</sup> mice transplanted with wild-type BM fed WTD for different periods of time in atherosclerosis study 1 (12 weeks study) and 2 (23 weeks study).

**Figure I**

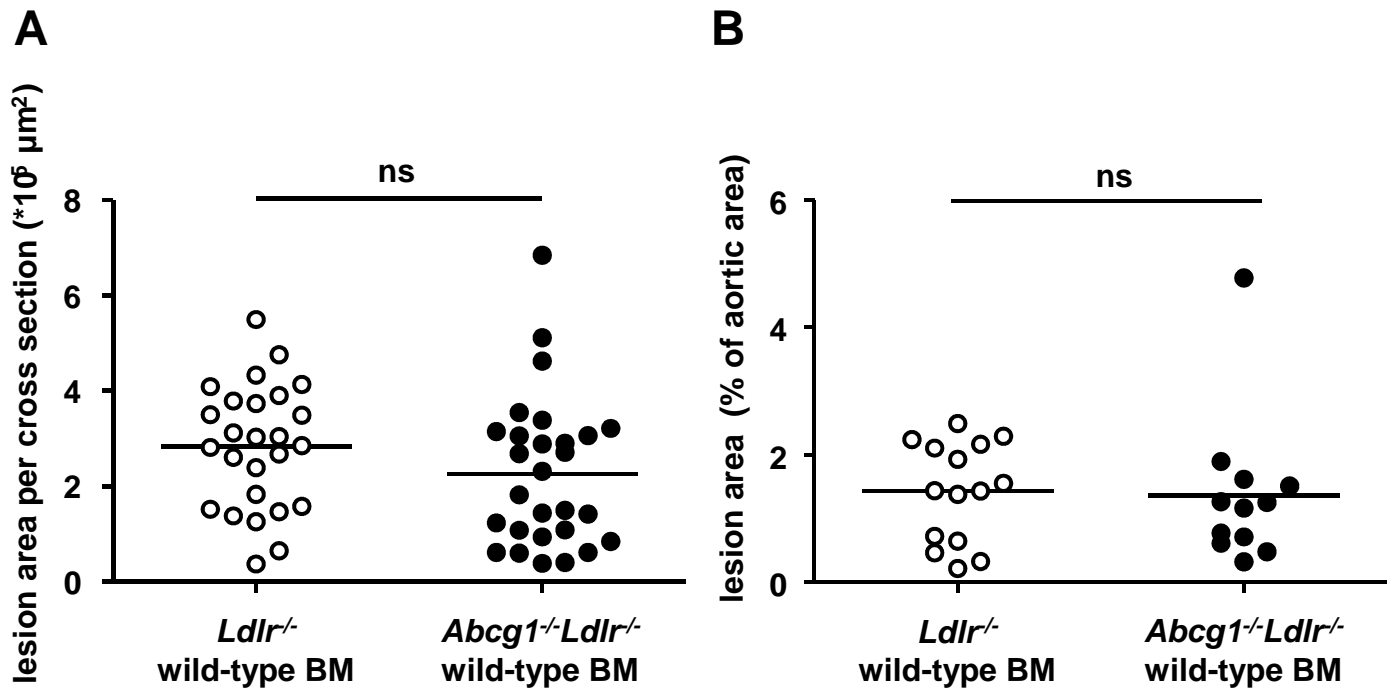

**Figure I.** Atherosclerosis in *Ldlr*<sup>-/-</sup> (n=26) and *Abcg1*<sup>-/-</sup>*Ldlr*<sup>-/-</sup> (n=28) mice transplanted with wild-type BM after 12 weeks of WTD. Haematoxylin-eosin staining was performed on paraffin sections of the aortic root and Oil Red O staining on the aortic arch and descending aorta. Atherosclerotic lesion area in **(A)** the aortic root, and **(B)** the aortic arch and descending aorta. Each datapoint represents an individual mouse. ns, not significant.

## Figure II

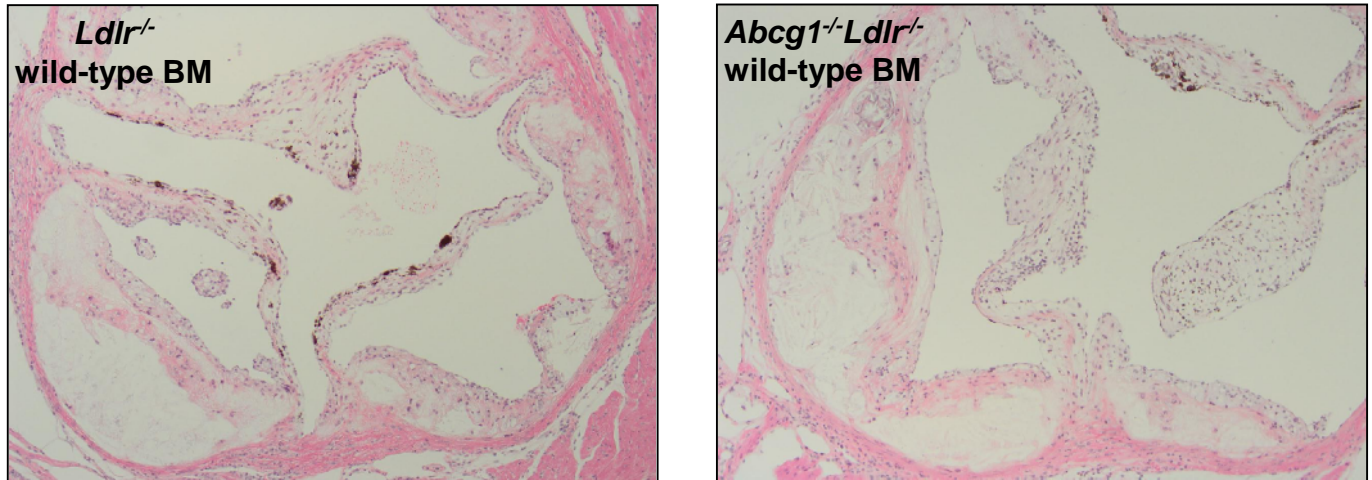

**Figure II.** Atherosclerosis in *Ldlr*<sup>-/-</sup> and *Abcg1*<sup>-/-</sup>*Ldlr*<sup>-/-</sup> mice transplanted with wild-type BM after 23 weeks of WTD. Haematoxylin-eosin staining was performed on paraffin sections of the aortic root. Representative sections of the aortic root of *Ldlr*<sup>-/-</sup> and *Abcg1*<sup>-/-</sup>*Ldlr*<sup>-/-</sup> mice are shown.

## Figure III

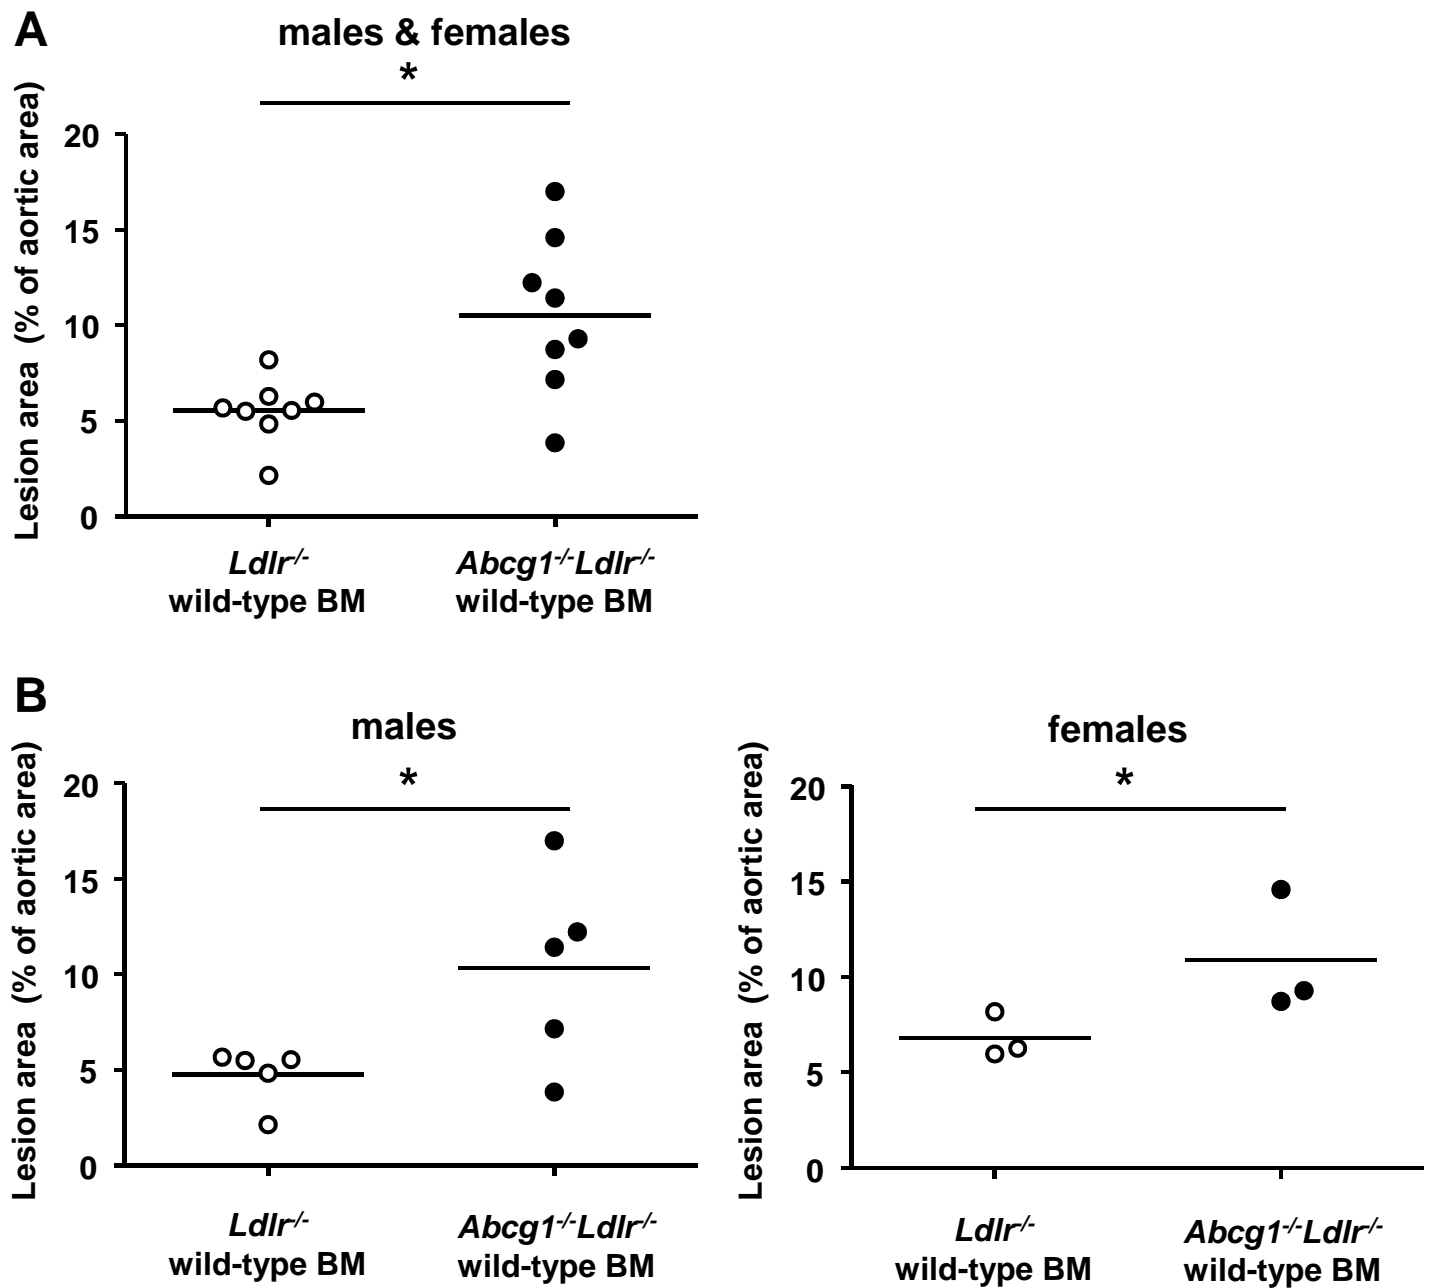

**Figure III.** Atherosclerosis in *Ldlr*<sup>-/-</sup> and *Abcg1*<sup>-/-</sup>*Ldlr*<sup>-/-</sup> mice transplanted with wild-type BM after 23 weeks of WTD. Oil Red O staining was performed on the aortic arch and descending aorta. **A-C.** Atherosclerotic lesion area in the aortic arch and descending aorta of males (n=5 per genotype) and females (n=3 per genotype) (**A**) combined, (**B**) males only or (**C**) females only. Each datapoint represents an individual mouse. \**P*<0.05.

## Figure IV

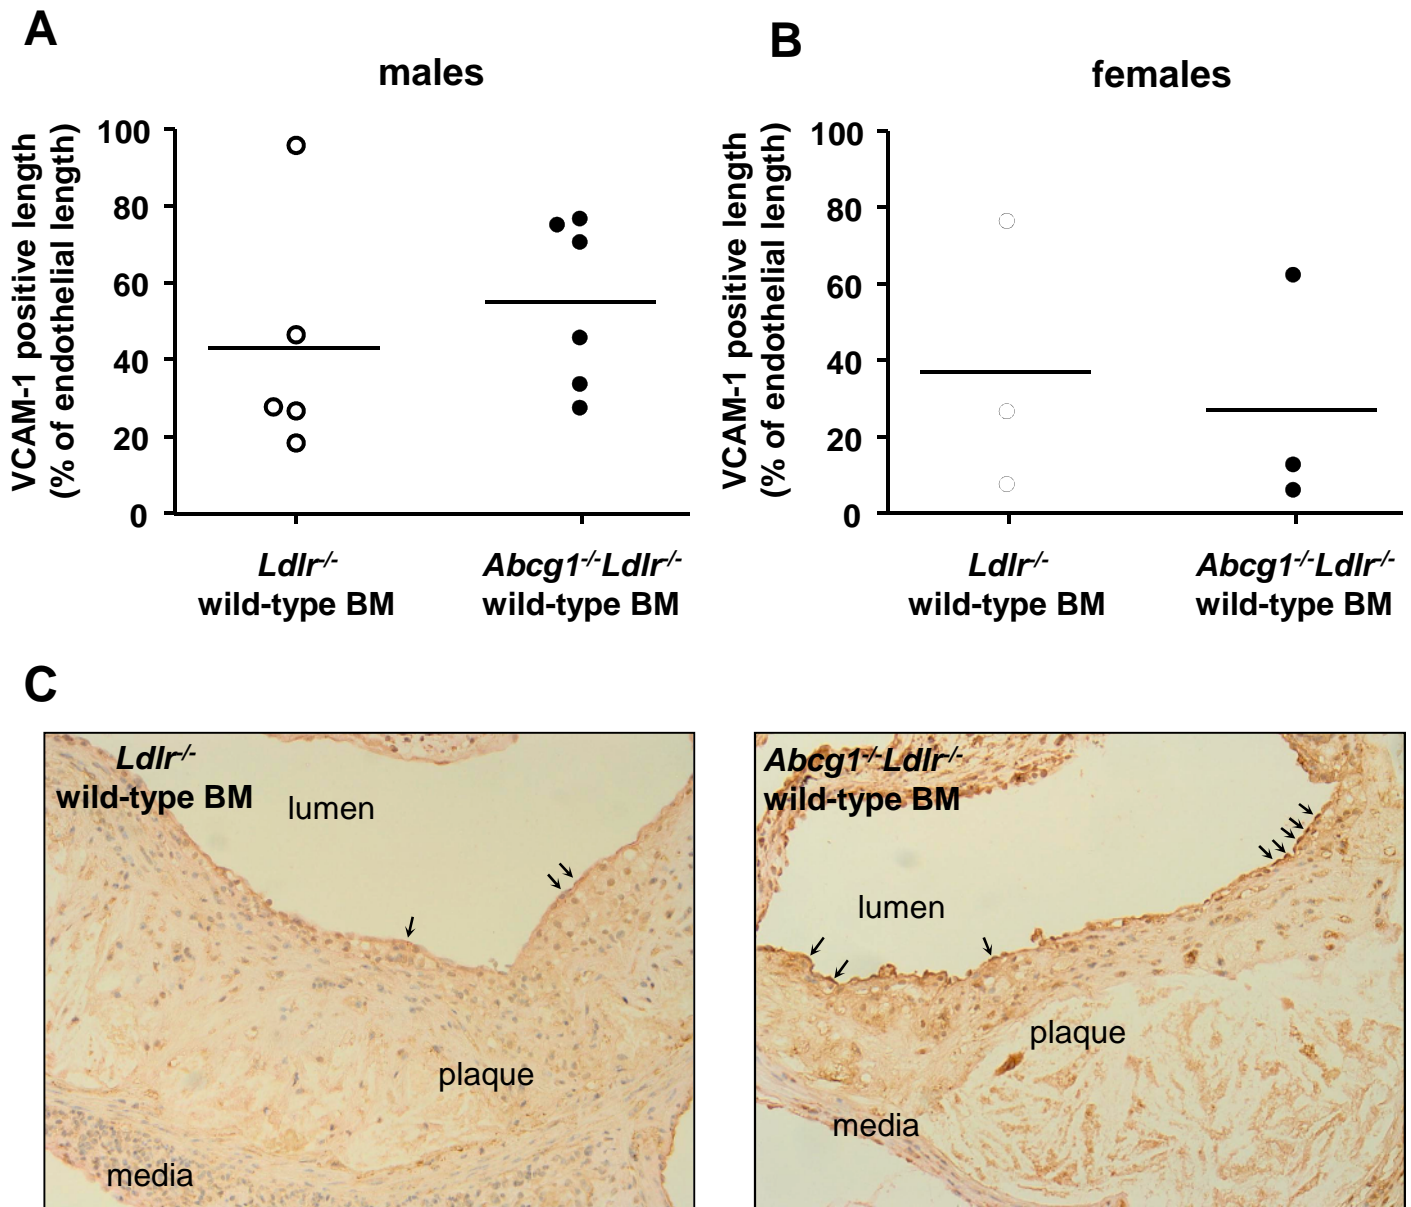

**Figure IV.** VCAM-1 positive areas in the endothelial cell monolayer of the aortic root of *Ldlr*<sup>-/-</sup> and *Abcg1*<sup>-/-</sup>*Ldlr*<sup>-/-</sup> mice transplanted with wild-type BM after 23 weeks of WTD. VCAM-1 positive % of endothelial length in (A) *Ldlr*<sup>-/-</sup> (n=5) and *Abcg1*<sup>-/-</sup>*Ldlr*<sup>-/-</sup> (n=6) male recipients, and (B) *Ldlr*<sup>-/-</sup> (n=3) and *Abcg1*<sup>-/-</sup>*Ldlr*<sup>-/-</sup> (n=3) female recipients. C. Representative sections of VCAM-1 positive areas in the endothelium of the aortic root. The arrows indicate the VCAM-1 positive areas.
